# Supplementary material
Source: PubMed Central journal article supplement (PMC4256854)
Supplement: supp_pp.114.249037_249037Supplemental_table_S1.pdf [file supp_pp.114.249037_249037Supplemental_table_S1.pdf]

**Supplemental table S1.** Overview of the experiments, treatments, and plant material used. Genotypes were classified as ‘reduced CCFN’  $\leq 10$  cell files and ‘many CCFN’  $\geq 13$  cell files.

| Experiment ID | Environment              | Treatment    | Group by phenotype | RIL         | CCFN $\pm$ SD |
|---------------|--------------------------|--------------|--------------------|-------------|---------------|
| GH2           | Greenhouse               | WW-WS        | Many CCFN          | Mo146       | 14 $\pm$ 1.4  |
|               |                          |              | Many CCFN          | Mo263       | 14 $\pm$ 0.6  |
|               |                          |              | Many CCFN          | Mo345       | 13 $\pm$ 0    |
|               |                          |              | Reduced CCFN       | Mo048       | 10 $\pm$ 0.4  |
|               |                          |              | Reduced CCFN       | Mo178       | 9 $\pm$ 0.9   |
|               |                          |              | Reduced CCFN       | Mo277       | 9 $\pm$ 0.6   |
| GH3           | Greenhouse               | WW-WS        | Many CCFN          | Mo129       | 13 $\pm$ 0.9  |
|               |                          |              | Many CCFN          | Mo181       | 14 $\pm$ 0.8  |
|               |                          |              | Many CCFN          | Mo284       | 14 $\pm$ 1    |
|               |                          |              | Reduced CCFN       | Mo277       | 9 $\pm$ 1     |
|               |                          |              | Reduced CCFN       | Mo317       | 9 $\pm$ 0.8   |
|               |                          |              | Reduced CCFN       | Mo365       | 8 $\pm$ 0.4   |
| PA2011        | Field, Rainout shelter   | WW-WS        | Many CCFN          | Mo129       | 14 $\pm$ 1.1  |
|               |                          |              | Many CCFN          | Mo132       | 15 $\pm$ 0.8  |
|               |                          |              | Many CCFN          | Mo181       | 14 $\pm$ 0.8  |
|               |                          |              | Reduced CCFN       | Mo233       | 9 $\pm$ 0.5   |
|               |                          |              | Reduced CCFN       | Mo317       | 9 $\pm$ 1.4   |
|               |                          |              | Reduced CCFN       | Mo365       | 9 $\pm$ 0.7   |
| PA2012        | Field, rainout shelter   | WW-WS        | Many CCFN          | Mo146       | 14 $\pm$ 0.5  |
|               |                          |              | Many CCFN          | Mo263       | 14 $\pm$ 0.6  |
|               |                          |              | Many CCFN          | Mo345       | 14 $\pm$ 0.5  |
|               |                          |              | Reduced CCFN       | Mo048       | 9 $\pm$ 1.2   |
|               |                          |              | Reduced CCFN       | Mo178       | 9 $\pm$ 0.6   |
|               |                          |              | Reduced CCFN       | Mo277       | 9 $\pm$ 1     |
| MW2012-2      | Field-Bunda, Chitala, MW | WW-WS        | Many CCFN          | 46C2W       | 15 $\pm$ 0.9  |
|               |                          |              | Many CCFN          | AR239-2     | 15 $\pm$ 0.5  |
|               |                          |              | Many CCFN          | AR267       | 15 $\pm$ 0.9  |
|               |                          |              | Many CCFN          | AR424(5012) | 15 $\pm$ 1.2  |
|               |                          |              | Many CCFN          | AR716       | 14 $\pm$ 0.9  |
|               |                          |              | Many CCFN          | AR858       | 14 $\pm$ 1.3  |
|               |                          |              | Many CCFN          | CML199      | 15 $\pm$ 0.9  |
|               |                          |              | Many CCFN          | CML322      | 15 $\pm$ 0.5  |
|               |                          |              | Many CCFN          | CML377      | 14 $\pm$ 0.7  |
|               |                          |              | Many CCFN          | E21         | 15 $\pm$ 0.9  |
|               |                          |              | Many CCFN          | M70-29-2    | 15 $\pm$ 0.9  |
|               |                          |              | Many CCFN          | M70-29-3    | 15 $\pm$ 1    |
|               |                          |              | Many CCFN          | M73-18      | 15 $\pm$ 1.2  |
|               |                          |              | Many CCFN          | Mkangala    | 12 $\pm$ 1.9  |
|               |                          |              | Many CCFN          | SC513       | 12 $\pm$ 2.1  |
|               |                          |              | Many CCFN          | SW18        | 12 $\pm$ 2.9  |
|               |                          |              | Many CCFN          | SW19        | 14 $\pm$ 0.5  |
|               |                          |              | Reduced CCFN       | AR403-3     | 10 $\pm$ 0.9  |
|               |                          |              | Reduced CCFN       | AR660       | 10 $\pm$ 3.2  |
|               |                          |              | Reduced CCFN       | CML196      | 10 $\pm$ 0.9  |
| Reduced CCFN  | CML247                   | 11 $\pm$ 0.8 |                    |             |               |
| Reduced CCFN  | CML321                   | 10 $\pm$ 0.9 |                    |             |               |
| Reduced CCFN  | CML339                   | 10 $\pm$ 1.1 |                    |             |               |
| Reduced CCFN  | CML344                   | 10 $\pm$ 0.9 |                    |             |               |
| Reduced CCFN  | CML373                   | 10 $\pm$ 1.1 |                    |             |               |
| Reduced CCFN  | CML442                   | 11 $\pm$ 0.9 |                    |             |               |
| Reduced CCFN  | CML511                   | 11 $\pm$ 0.7 |                    |             |               |

|              |              |        |
|--------------|--------------|--------|
| Reduced CCFN | CZL99011     | 11±1.8 |
| Reduced CCFN | M70-4-4      | 10±0.9 |
| Reduced CCFN | M70-5-2      | 11±0.9 |
| Reduced CCFN | M70-6-2      | 10±0.9 |
| Reduced CCFN | M70-9-1      | 10±1.1 |
| Reduced CCFN | MANICA-4     | 10±0.7 |
| Reduced CCFN | MAT273-4-2-1 | 10±0.9 |
| Reduced CCFN | SC403        | 11±0.5 |
| Reduced CCFN | ZM523        | 10±0.5 |

---
